# Supplementary material
Source: PubMed Central journal article supplement (PMC3392612)
Supplement: NIHMS372808-supplement-01.pdf [file NIHMS372808-supplement-01.pdf]

Figure S1 related to Figure 1

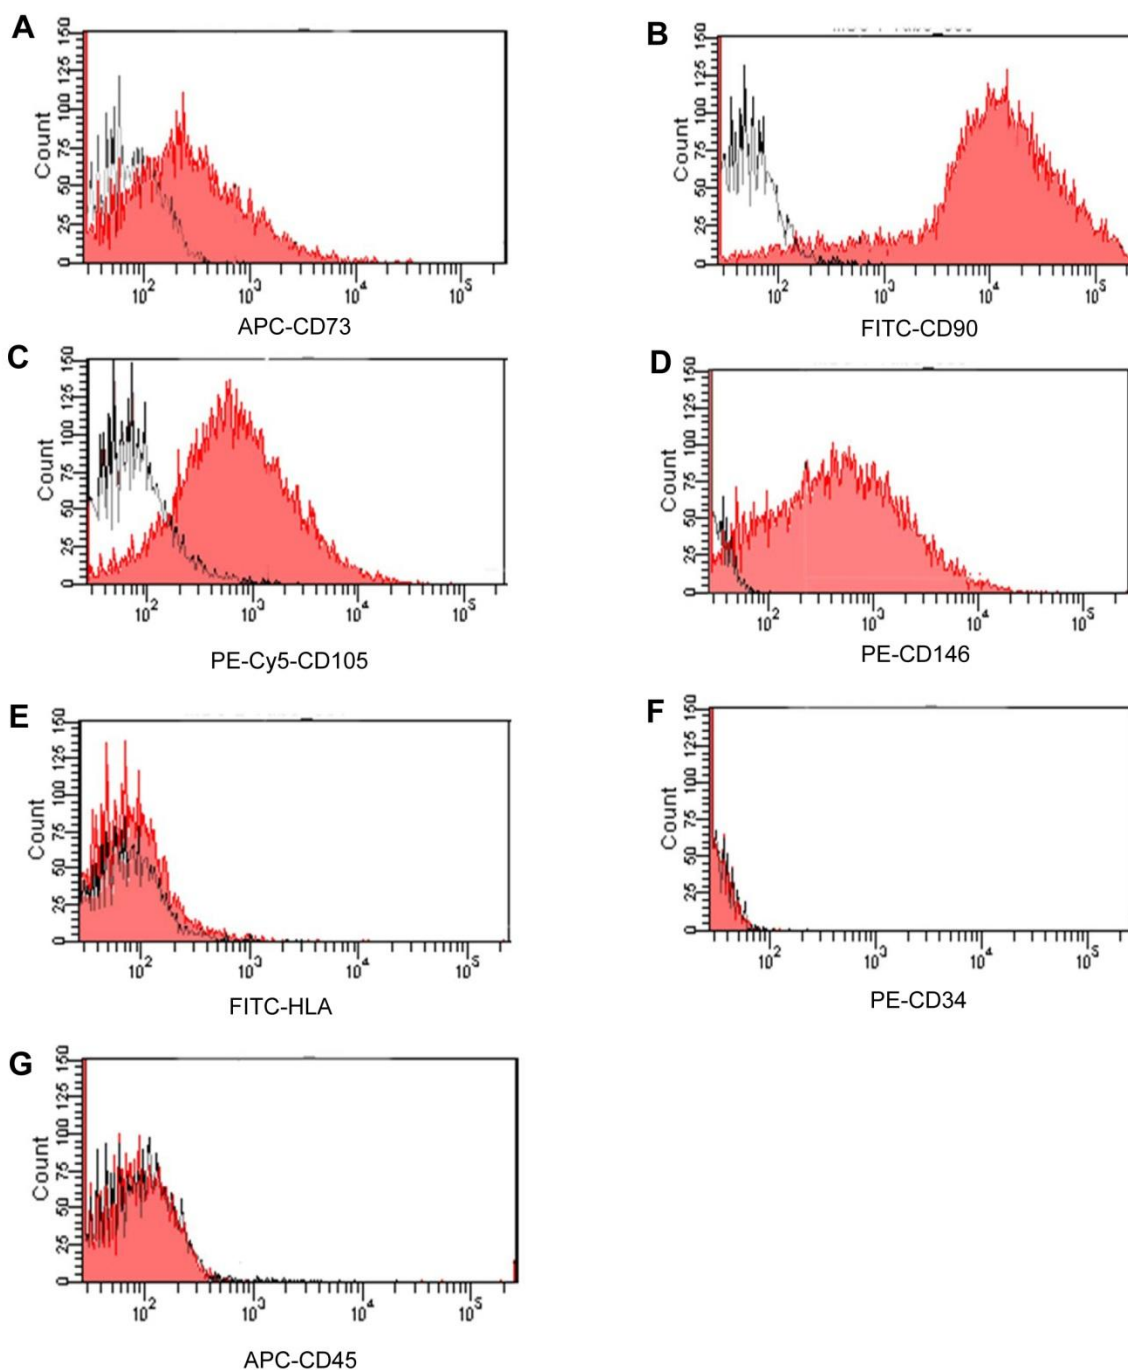

**Figure S1. Characterization of human MSC surface markers by flow cytometry (Related to Figure 1).** (A-D) MSCs expressed CD73, CD90, CD105 and CD146, respectively. (E-G) MSCs did not express CD34, CD45 and HLA, respectively.

**Fig. S2 related to Figure. 2**

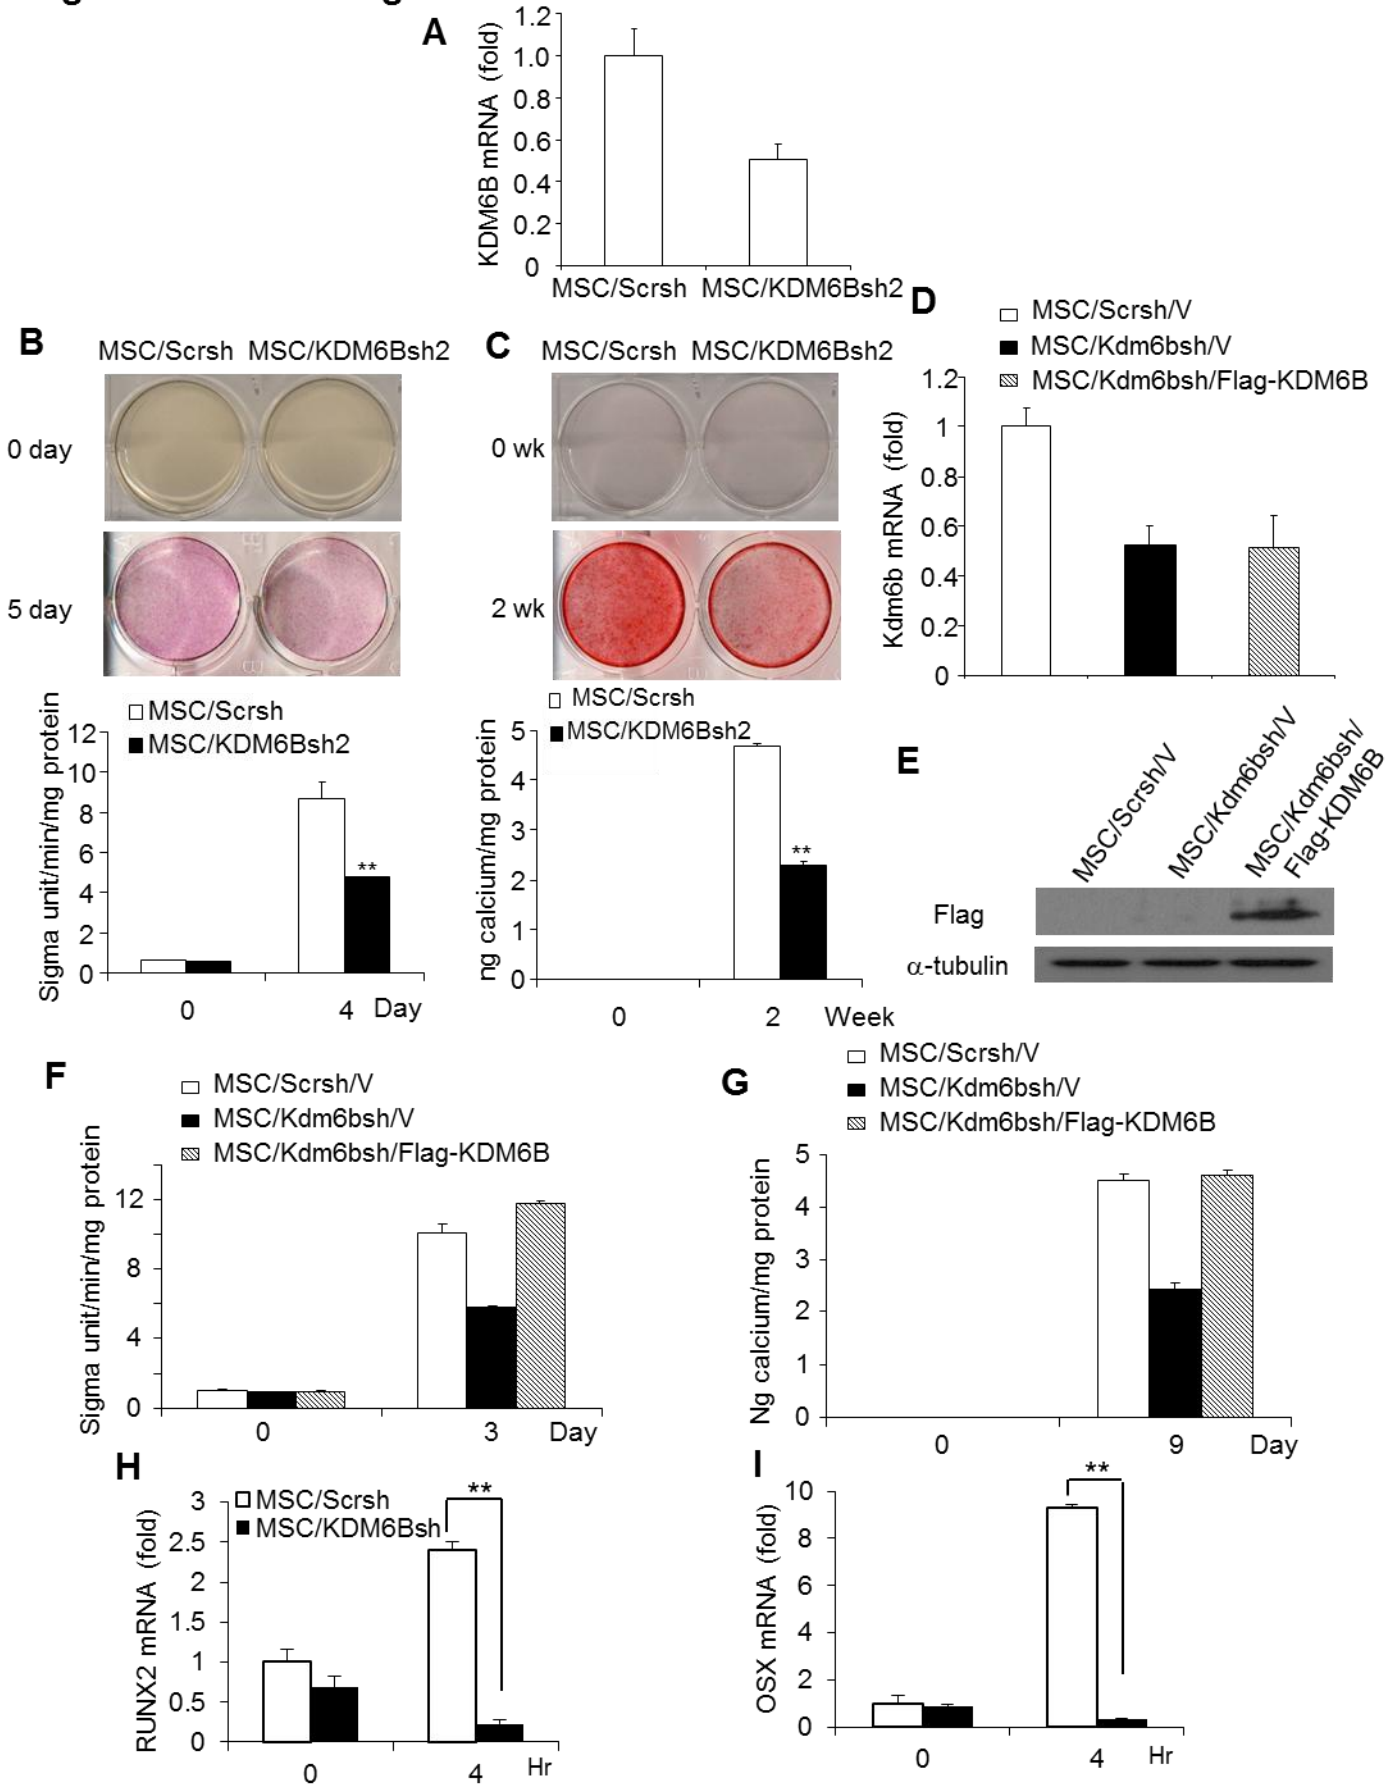

**Figure S2. KDM6B is required for osteogenic differentiation of MSCs (Related to Figure 2).** (A) Knock-down of *KDM6B* by a different shRNA sequence as determined by Real-time RT-PCR. MSC/KDM6Bsh2, MSCs expressing KDM6B shRNA2; MSC/Scrsh, MSCs expressing scramble shRNA. (B) Knock-down of KDM6B inhibited ALP activities in MSCs. Values are mean  $\pm$  s.d for triplicate samples from a representative experiment. \*\*P < 0.01. (C) Knock-down of KDM6B inhibited mineralization in MSCs. \*\*P < 0.01. (D) Examination of *Kdm6b* mRNA by Real-time RT-PCR. *Kdm6b* in mouse MSCs were knocked down and subsequently transduced with retroviruses expressing human Flag-KDM6B. MSC/Srsh/V, MSC/Scrsh expressing empty vector; MSC/Kdm6bsh/V, MSC/Kdm6bsh expressing empty vector; MSC/Kdm6bsh/Flag-KDM6B, MSC/Kdm6bsh expressing human Flag-KDM6B. (E) The restoration of KDM6B in *Kdm6b* knock-down MSCs by Western blot analysis. (F) The restoration of *KDM6B* in MSC increased ALP activities. (G) The restoration of *KDM6B* in MSCs increased mineralization. (H) Knock-down of KDM6B inhibited BMP-induced *Runx2* expression as determined by Real-time RT-PCR. (I) Knock-down of KDM6B inhibited BMP-induced *OSX* expression as determined by Real-time RT-PCR. .

**Figure S3 related to Figure. 3**

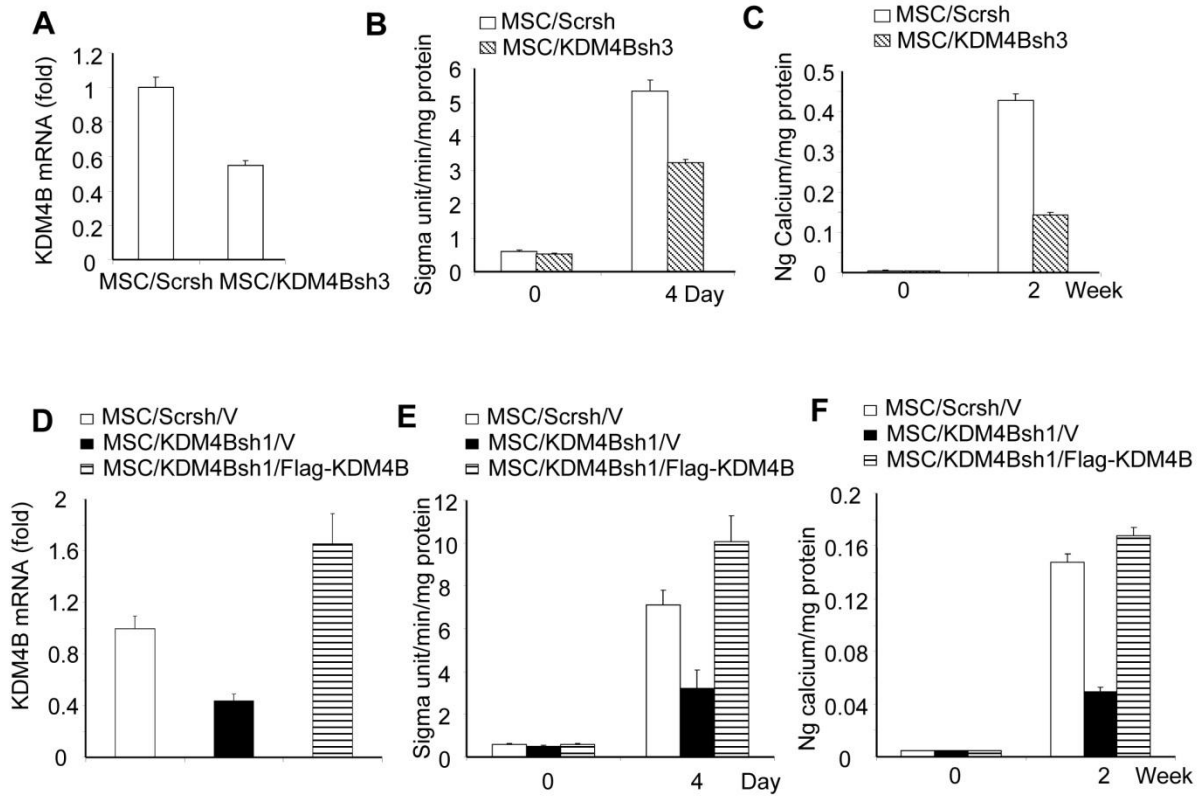

**Figure S3. KDM4B is required for osteogenic differentiation of MSCs (Related to Figure 3).**

(A) Knock-down of *KDM4B* by a different shRNA sequence as determined by Real-time RT-PCR. MSC/KDM4Bsh3, MSCs expressing KDM4B shRNA3; MSC/Scrsh, MSCs expressing scramble shRNA. (B) Knock-down of *KDM4B* inhibited ALP activities in MSCs.  $^{***}P < 0.01$ . (C) Knock-down of *KDM4B* inhibited mineralization in MSCs.  $^{***}P < 0.01$ . (D) The restoration of KDM4B expression in KDM4B knock-down MSCs as determined by Real-time RT-PCR. MSC/Scrsh/V, MSC/Scrsh expressing empty vector; MSC/KDM4Bsh1/V, MSC/KDM4Bsh1 expressing empty vector; MSC/KDM4Bsh1/Flag-KDM6B, MSC/KDM4Bsh1 expressing human Flag-KDM6B. (E) The restoration of KDM4B in MSC increased ALP activities. (F) The restoration of KDM4B in MSCs increased mineralization.

**Figure S4 related to Figure 5**

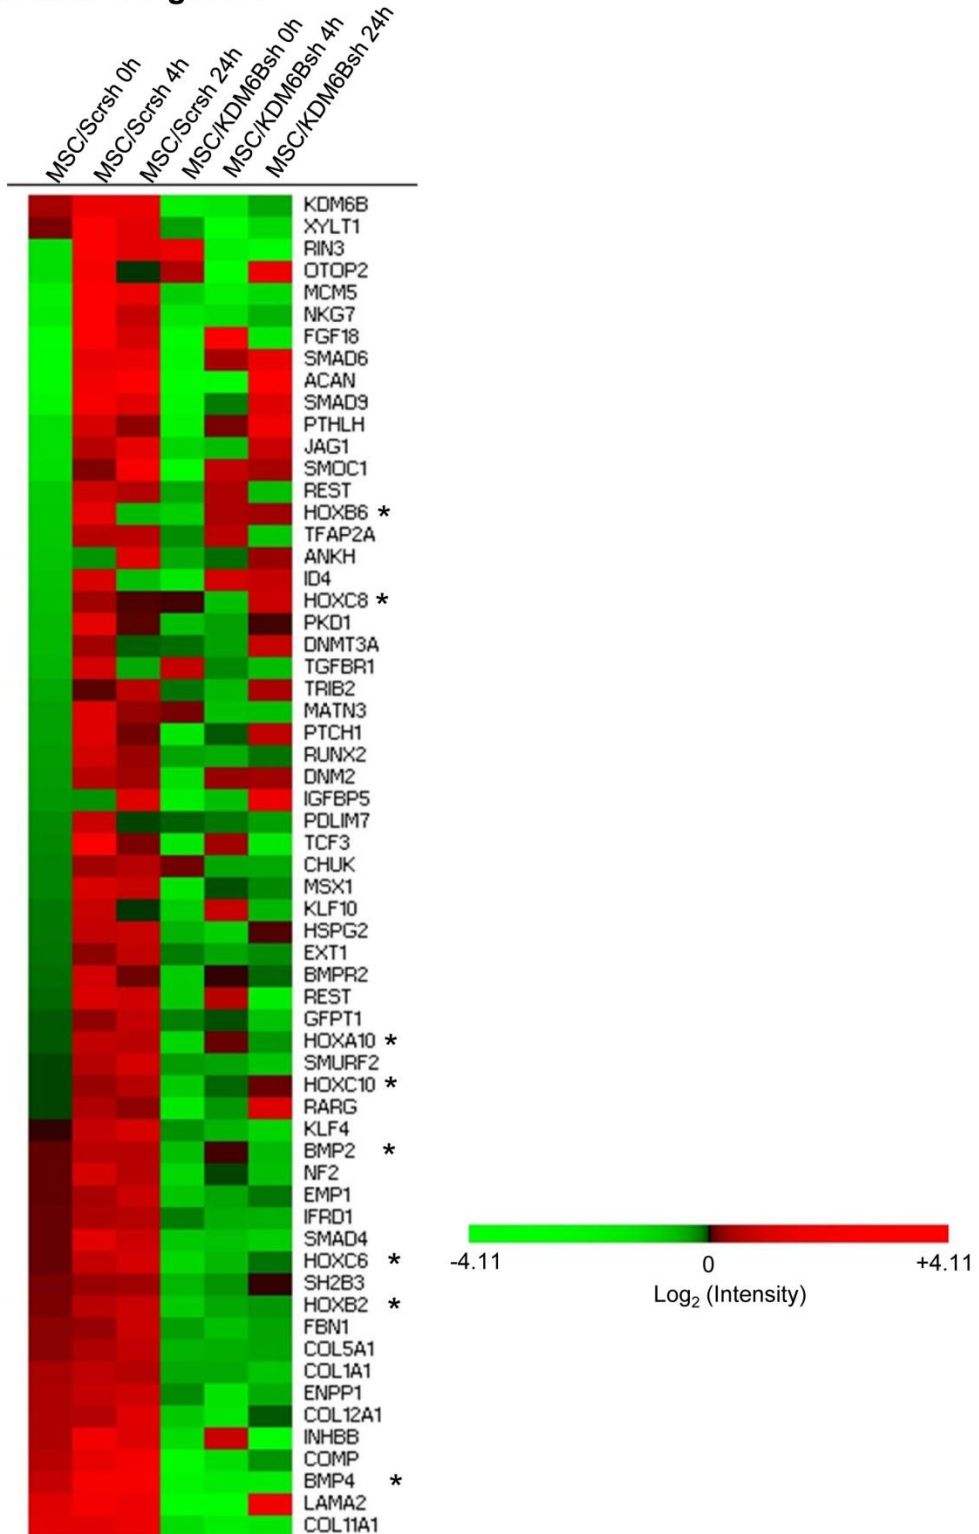

**Figure S4. Global analysis of KDM6B-dependent genes by microarray (Related to Figure 5).** The heatmap of representative KDM6B-dependent genes induced by BMPs at 0, 4 and 24 hr.

**Figure S5 related to Figure. 5**

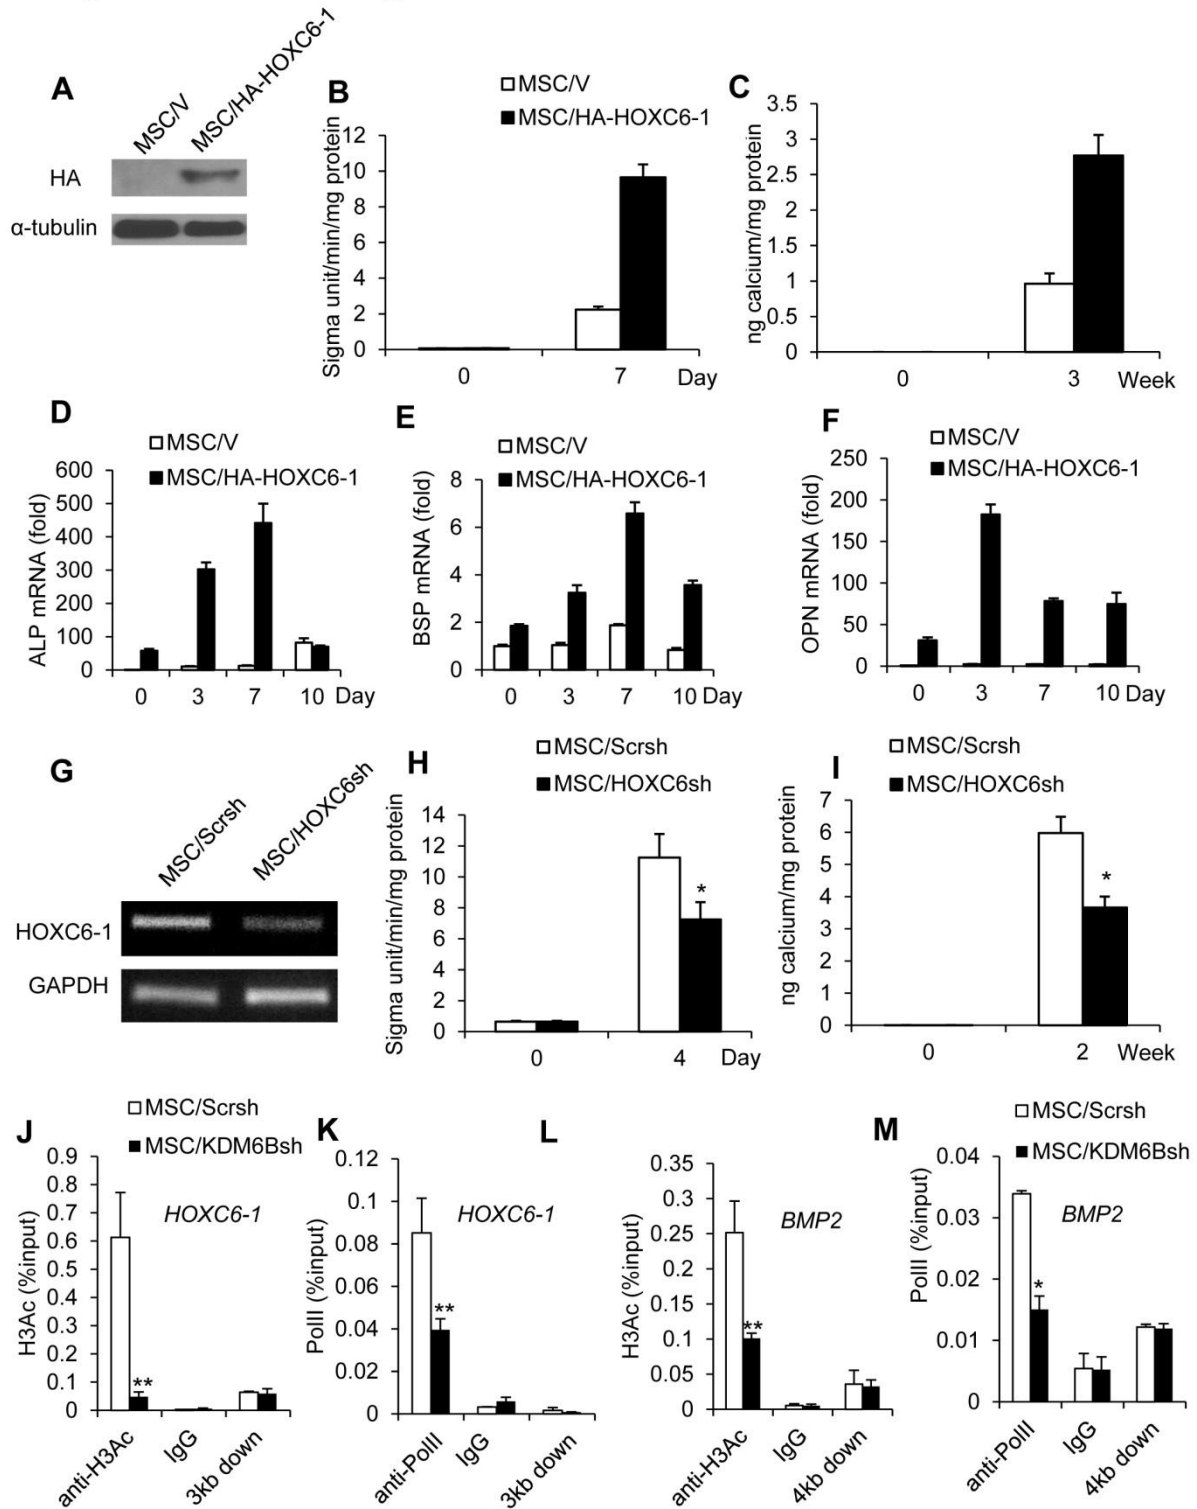

**Figure S5. HOXC6-1 plays a functional role in osteogenic differentiation of MSCs (Related to Figure 5).** (A) Over-expression of HOXC6-1 in MSCs. (B) Over-expression of HOXC6-1 increased ALP activities in MSCs. (C) Over-expression of HOXC6-1 increased mineralization in MSCs. (D) Over-expression of HOXC6-1 enhanced ALP expression. (E) Over-expression of HOXC6-1 enhanced *BSP* expression (F) Over-expression of HOXC6-1 enhanced *OPN* expression. (G) The knock-down of *HOXC6-1* in MSCs by shRNA. (H) The knock-down of *HOXC6-1* attenuated ALP activities in MSCs. (I) The knock-down of *HOXC6-1* attenuated mineralization in MSCs. (J) The knock-down of KDM6B reduced H3 acetylation on the HOXC6-1 promoter. (K) The knock-down of KDM6B reduced the recruitment of Pol II to the HOXC6-1 promoter. (L) The knock-down of KDM6B reduced H3 acetylation on the BMP2 promoter. (M) The knock-down of KDM6B reduced the recruitment of Pol II to the BMP2 promoter.



**Figure S6 related to Figure 6**

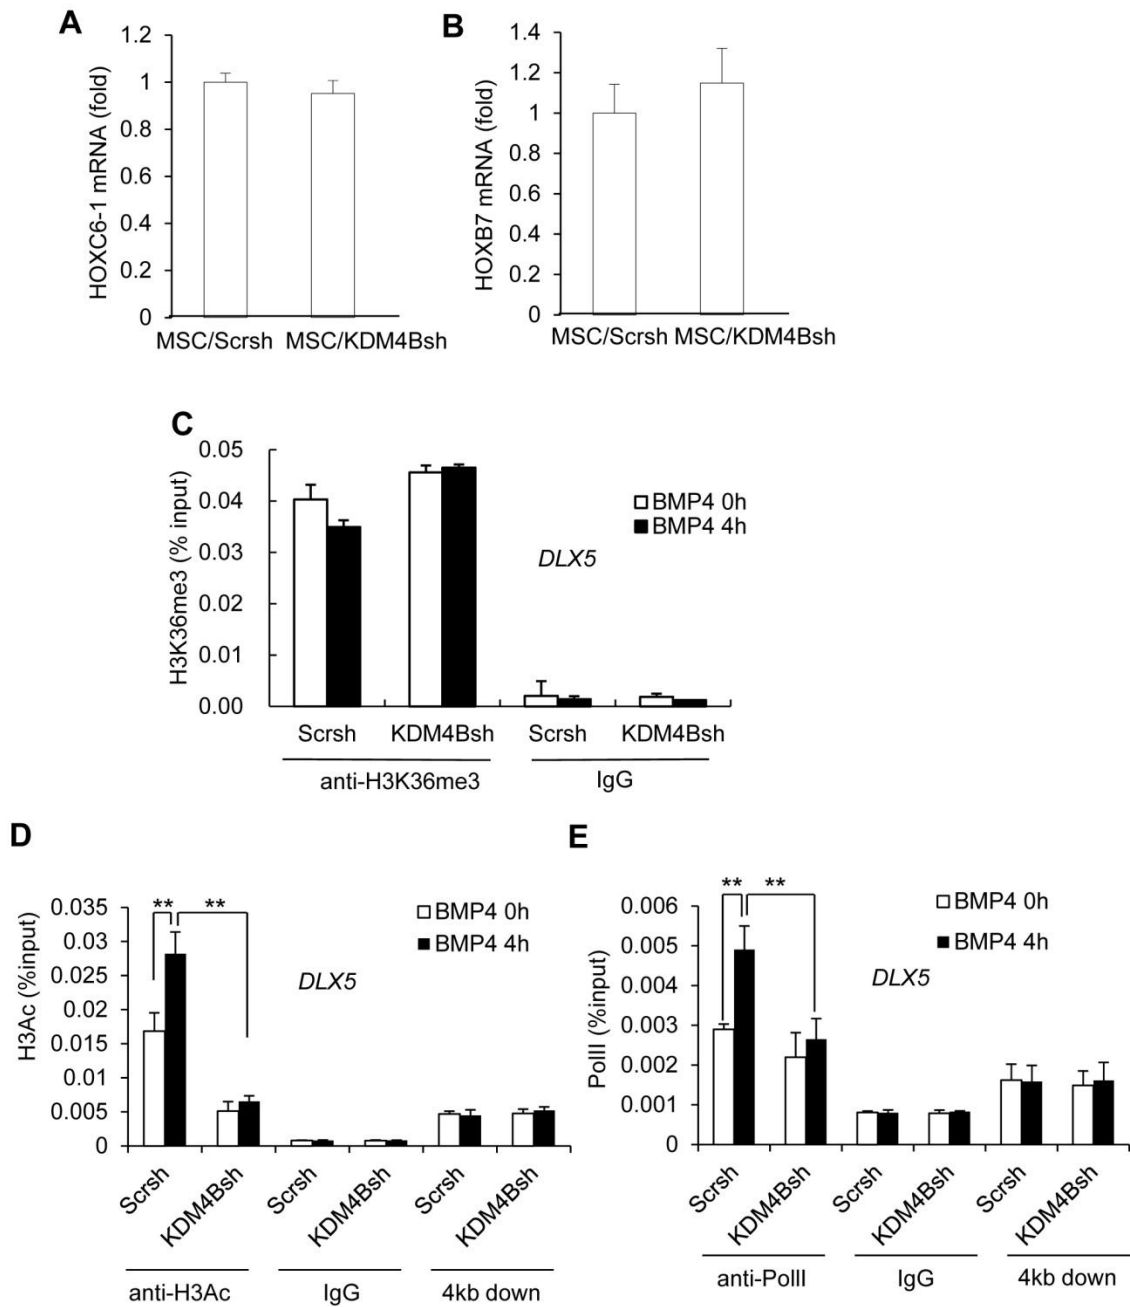

**Figure S6. The demethylation of H3K9me3 by KDM4B promotes H3 acetylation and recruits RNA polymerase II (Pol II) to the target gene promoters (Related to Figure 6).** (A) The knock-down of *KDM4B* did not affect the expression of *HOXC6-1* by Real-time RT-PCR. (B) The knock-down of *KDM4B* did not affect the expression of *HOXB7* by Real-time RT-PCR. (C) The knock-down of *KDM4B* did not affect H3K36me3 on the *DLX5* promoter. (D) The knock-down of *KDM4B* reduced H3 acetylation on the *DLX5* promoter. (E) The knock-down of *KDM4B* reduced the recruitment of Pol II to the *DLX5* promoter.

**Figure S7 related to Figure 6**

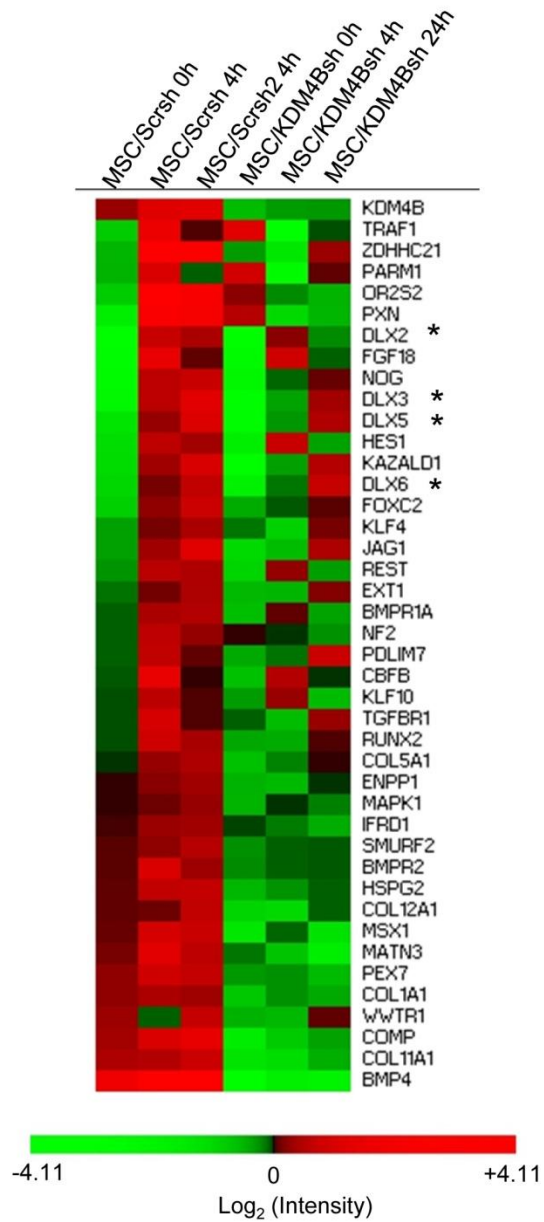

**Figure S7. Global analysis of KDM4B-dependent genes by microarray (Related to Figure 6).** The heatmap of representative KDM4B-dependent genes induced by BMPs at 0, 4 and 24 hr.

**Table S1. GO Analysis of KDM6B-dependent Genes at Basal Level (Related to Figure 5).** GO analysis was performed using the online Database for Annotation, Visualization and Integration Discovery (DAVID) Bioinformatics Resources v6.7. P values were calculated based on hypergeometric distribution. Only significantly overexpressed ( $p < 0.05$ ) GO terms were included.

**Table S2. GO analysis of KDM6B-dependent genes induced by BMP4/7 at 4hr (Related to Figure 5)**

| GO Term                                                                                                 | Count | P Value  |
|---------------------------------------------------------------------------------------------------------|-------|----------|
| GO:0010605-negative regulation of macromolecule metabolic process                                       | 37    | 0.00199  |
| GO:0010604-positive regulation of macromolecule metabolic process                                       | 35    | 0.0492   |
| GO:0009890-negative regulation of biosynthetic process                                                  | 32    | 8.84E-04 |
| GO:0031327-negative regulation of cellular biosynthetic process                                         | 32    | 6.18E-04 |
| GO:0006357-regulation of transcription from RNA polymerase II promoter                                  | 31    | 0.04059  |
| GO:0010558-negative regulation of macromolecule biosynthetic process                                    | 31    | 8.64E-04 |
| GO:0009891-positive regulation of biosynthetic process                                                  | 30    | 0.03892  |
| GO:0031328-positive regulation of cellular biosynthetic process                                         | 30    | 0.03375  |
| GO:0010557-positive regulation of macromolecule biosynthetic process                                    | 30    | 0.0196   |
| GO:0051172-negative regulation of nitrogen compound metabolic process                                   | 30    | 7.91E-04 |
| GO:0006468-protein amino acid phosphorylation                                                           | 29    | 0.03864  |
| GO:0046907-intracellular transport                                                                      | 29    | 0.03338  |
| GO:0045934-negative regulation of nucleobase, nucleoside, nucleotide and nucleic acid metabolic process | 29    | 0.00132  |
| GO:0001501-skeletal system development                                                                  | 29    | 2.77E-07 |
| GO:0010628-positive regulation of gene expression                                                       | 28    | 0.01372  |
| GO:0045935-positive regulation of nucleobase, nucleoside, nucleotide and nucleic acid metabolic process | 27    | 0.04908  |
| GO:0045941-positive regulation of transcription                                                         | 27    | 0.01691  |
| GO:0010629-negative regulation of gene expression                                                       | 27    | 0.00423  |
| GO:0016481-negative regulation of transcription                                                         | 25    | 0.00501  |
| GO:0007010-cytoskeleton organization                                                                    | 23    | 0.01052  |
| GO:0045893-positive regulation of transcription, DNA-dependent                                          | 22    | 0.04505  |
| GO:0032989-cellular component morphogenesis                                                             | 19    | 0.04856  |
| GO:0045944-positive regulation of transcription from RNA polymerase II promoter                         | 19    | 0.02801  |
| GO:0051253-negative regulation of RNA metabolic process                                                 | 19    | 0.02266  |
| GO:0048598-embryonic morphogenesis                                                                      | 19    | 0.00459  |
| GO:0045892-negative regulation of transcription, DNA-dependent                                          | 18    | 0.03608  |
| GO:0007167-enzyme linked receptor protein signaling pathway                                             | 18    | 0.0259   |
| GO:0009792-embryonic development ending in birth or egg hatching                                        | 18    | 0.02094  |
| GO:0043009-chordate embryonic development                                                               | 18    | 0.01961  |
| GO:0007507-heart development                                                                            | 17    | 6.66E-04 |
| GO:0016568-chromatin modification                                                                       | 15    | 0.03345  |
| GO:0007389-pattern specification process                                                                | 15    | 0.02777  |
| GO:0034660-ncRNA metabolic process                                                                      | 13    | 0.0411   |
| GO:0045597-positive regulation of cell differentiation                                                  | 13    | 0.03983  |
| GO:0030036-actin cytoskeleton organization                                                              | 13    | 0.0366   |
| GO:0048729-tissue morphogenesis                                                                         | 13    | 0.00729  |
| GO:0048705-skeletal system morphogenesis                                                                | 13    | 1.16E-04 |
| GO:0007178-transmembrane receptor protein serine/threonine kinase signaling pathway                     | 13    | 5.11E-05 |
| GO:0003002-regionalization                                                                              | 12    | 0.03258  |
| GO:0048568-embryonic organ development                                                                  | 11    | 0.03186  |
| GO:0045165-cell fate commitment                                                                         | 11    | 0.00827  |
| GO:0022604-regulation of cell morphogenesis                                                             | 11    | 0.0055   |
| GO:0051216-cartilage development                                                                        | 11    | 6.06E-05 |
| GO:0048562-embryonic organ morphogenesis                                                                | 10    | 0.01724  |
| GO:0060348-bone development                                                                             | 10    | 0.01075  |
| GO:0001503-ossification                                                                                 | 10    | 0.00705  |
| GO:0016055-Wnt receptor signaling pathway                                                               | 9     | 0.0438   |
| GO:0017038-protein import                                                                               | 9     | 0.04064  |
| GO:0001655-urogenital system development                                                                | 9     | 0.01628  |
| GO:0030198-extracellular matrix organization                                                            | 9     | 0.01191  |
| GO:0001822-kidney development                                                                           | 9     | 0.0075   |
| GO:0030509-BMP signaling pathway                                                                        | 9     | 3.80E-05 |
| GO:0048706-embryonic skeletal system development                                                        | 8     | 0.00763  |
| GO:0031344-regulation of cell projection organization                                                   | 7     | 0.04813  |
| GO:0030278-regulation of ossification                                                                   | 7     | 0.02774  |
| GO:0003007-heart morphogenesis                                                                          | 7     | 0.02076  |
| GO:0006839-mitochondrial transport                                                                      | 7     | 0.01612  |
| GO:0042476-odontogenesis                                                                                | 7     | 0.00502  |
| GO:0001764-neuron migration                                                                             | 6     | 0.04053  |
| GO:0007179-transforming growth factor beta receptor signaling pathway                                   | 6     | 0.0319   |
| GO:0048704-embryonic skeletal system morphogenesis                                                      | 6     | 0.02626  |
| GO:0009612-response to mechanical stimulus                                                              | 6     | 0.02453  |
| GO:0030199-collagen fibril organization                                                                 | 6     | 0.00146  |
| GO:0002274-myeloid leukocyte activation                                                                 | 5     | 0.04638  |
| GO:0045667-regulation of osteoblast differentiation                                                     | 5     | 0.03755  |
| GO:0042475-odontogenesis of dentine-containing tooth                                                    | 5     | 0.02742  |
| GO:0006626-protein targeting to mitochondrion                                                           | 5     | 0.01733  |
| GO:0070585-protein localization in mitochondrion                                                        | 5     | 0.01733  |
| GO:0070167-regulation of biomineral formation                                                           | 5     | 0.01407  |
| GO:0030500-regulation of bone mineralization                                                            | 5     | 0.01123  |
| GO:0045669-positive regulation of osteoblast differentiation                                            | 5     | 0.00582  |
| GO:0060393-regulation of pathway-restricted SMAD protein phosphorylation                                | 5     | 0.00132  |
| GO:0031032-actomyosin structure organization                                                            | 4     | 0.04868  |
| GO:0050994-regulation of lipid catabolic process                                                        | 4     | 0.04033  |
| GO:0045778-positive regulation of ossification                                                          | 4     | 0.03278  |
| GO:0060349-bone morphogenesis                                                                           | 4     | 0.02013  |
| GO:0001502-cartilage condensation                                                                       | 4     | 0.01749  |
| GO:0002062-chondrocyte differentiation                                                                  | 4     | 0.01505  |
| GO:0060350-endochondral bone morphogenesis                                                              | 4     | 0.01079  |
| GO:0010862-positive regulation of pathway-restricted SMAD protein phosphorylation                       | 4     | 0.00733  |
| GO:0001958-endochondral ossification                                                                    | 4     | 0.00463  |
| GO:0030520-estrogen receptor signaling pathway                                                          | 3     | 0.04021  |
| GO:0033158-regulation of protein import into nucleus, translocation                                     | 3     | 0.02736  |
| GO:0002063-chondrocyte development                                                                      | 3     | 0.0166   |
| GO:0002011-morphogenesis of an epithelial sheet                                                         | 3     | 0.0166   |
| GO:0033160-positive regulation of protein import into nucleus, translocation                            | 3     | 0.0166   |
| GO:0060391-positive regulation of SMAD protein nuclear translocation                                    | 3     | 0.01209  |
| GO:0060390-regulation of SMAD protein nuclear translocation                                             | 3     | 0.01209  |

**Table S3. GO analysis of KDM6B-dependent genes induced by BMP4/7 at 24hr (Related to Figure 5)**

| GO Term                                                                                                 | Count | PValue    |
|---------------------------------------------------------------------------------------------------------|-------|-----------|
| GO:0006796-phosphate metabolic process                                                                  | 34    | 0.0250278 |
| GO:0006793-phosphorus metabolic process                                                                 | 34    | 0.0250278 |
| GO:0042127-regulation of cell proliferation                                                             | 32    | 0.0040548 |
| GO:0016310-phosphorylation                                                                              | 31    | 0.0090636 |
| GO:0008104-protein localization                                                                         | 30    | 0.0479707 |
| GO:0010605-negative regulation of macromolecule metabolic process                                       | 29    | 0.0092455 |
| GO:0006468-protein amino acid phosphorylation                                                           | 28    | 0.0049345 |
| GO:0045184-establishment of protein localization                                                        | 27    | 0.0454356 |
| GO:0015031-protein transport                                                                            | 27    | 0.0411137 |
| GO:0016265-death                                                                                        | 27    | 0.023494  |
| GO:0008219-cell death                                                                                   | 26    | 0.0368797 |
| GO:0007155-cell adhesion                                                                                | 25    | 0.047497  |
| GO:0022610-biological adhesion                                                                          | 25    | 0.0465679 |
| GO:0012501-programmed cell death                                                                        | 23    | 0.0352457 |
| GO:0006915-apoptosis                                                                                    | 23    | 0.0307612 |
| GO:0009890-negative regulation of biosynthetic process                                                  | 23    | 0.0187275 |
| GO:0031327-negative regulation of cellular biosynthetic process                                         | 23    | 0.0150366 |
| GO:0010558-negative regulation of macromolecule biosynthetic process                                    | 22    | 0.0213878 |
| GO:0051172-negative regulation of nitrogen compound metabolic process                                   | 21    | 0.0235988 |
| GO:0045934-negative regulation of nucleobase, nucleoside, nucleotide and nucleic acid metabolic process | 20    | 0.0374425 |
| GO:0019220-regulation of phosphate metabolic process                                                    | 20    | 0.0232554 |
| GO:0051174-regulation of phosphorus metabolic process                                                   | 20    | 0.0232554 |
| GO:0042325-regulation of phosphorylation                                                                | 20    | 0.0160385 |
| GO:0001501-skeletal system development                                                                  | 20    | 2.34E-04  |
| GO:0007010-cytoskeleton organization                                                                    | 18    | 0.0320505 |
| GO:0051338-regulation of transferase activity                                                           | 17    | 0.0167412 |
| GO:0048598-embryonic morphogenesis                                                                      | 17    | 0.0028499 |
| GO:0043549-regulation of kinase activity                                                                | 15    | 0.046915  |
| GO:0045892-negative regulation of transcription, DNA-dependent                                          | 15    | 0.0459916 |
| GO:0045859-regulation of protein kinase activity                                                        | 15    | 0.0369354 |
| GO:0007167-enzyme linked receptor protein signaling pathway                                             | 15    | 0.0345855 |
| GO:0040008-regulation of growth                                                                         | 15    | 0.0340059 |
| GO:0051094-positive regulation of developmental process                                                 | 13    | 0.0346589 |
| GO:0032535-regulation of cellular component size                                                        | 13    | 0.0291296 |
| GO:0060284-regulation of cell development                                                               | 13    | 0.0037293 |
| GO:0048729-tissue morphogenesis                                                                         | 13    | 0.0012635 |
| GO:0045597-positive regulation of cell differentiation                                                  | 12    | 0.0213859 |
| GO:0060429-epithelium development                                                                       | 12    | 0.020185  |
| GO:0001558-regulation of cell growth                                                                    | 12    | 0.0068033 |
| GO:0051960-regulation of nervous system development                                                     | 12    | 0.0063115 |
| GO:0050767-regulation of neurogenesis                                                                   | 12    | 0.0020893 |
| GO:0007423-sensory organ development                                                                    | 11    | 0.0476433 |
| GO:0045596-negative regulation of cell differentiation                                                  | 11    | 0.0341763 |
| GO:0008361-regulation of cell size                                                                      | 11    | 0.025893  |
| GO:0045664-regulation of neuron differentiation                                                         | 10    | 0.0045224 |
| GO:0051216-cartilage development                                                                        | 10    | 6.22E-05  |
| GO:0022604-regulation of cell morphogenesis                                                             | 9     | 0.0130635 |
| GO:0045165-cell fate commitment                                                                         | 8     | 0.0484699 |
| GO:0048562-embryonic organ morphogenesis                                                                | 8     | 0.0397577 |
| GO:0048705-skeletal system morphogenesis                                                                | 8     | 0.0175327 |
| GO:0016051-carbohydrate biosynthetic process                                                            | 8     | 0.0139383 |
| GO:0007178-transmembrane receptor protein serine/threonine kinase signaling pathway                     | 8     | 0.011469  |
| GO:0002009-morphogenesis of an epithelium                                                               | 8     | 0.0103611 |
| GO:0007568-aging                                                                                        | 7     | 0.0475366 |
| GO:0001655-urogenital system development                                                                | 7     | 0.0475366 |
| GO:0001822-kidney development                                                                           | 7     | 0.0269717 |
| GO:0009894-regulation of catabolic process                                                              | 7     | 0.0269717 |
| GO:0010769-regulation of cell morphogenesis involved in differentiation                                 | 7     | 0.009995  |
| GO:0009612-response to mechanical stimulus                                                              | 7     | 0.0020711 |
| GO:0048706-embryonic skeletal system development                                                        | 6     | 0.0364141 |
| GO:0010975-regulation of neuron projection development                                                  | 6     | 0.0254655 |
| GO:0030509-BMP signaling pathway                                                                        | 6     | 0.0037585 |
| GO:0048704-embryonic skeletal system morphogenesis                                                      | 5     | 0.0464755 |
| GO:0042476-odontogenesis                                                                                | 5     | 0.0392947 |
| GO:0009064-glutamine family amino acid metabolic process                                                | 5     | 0.0348867 |
| GO:0001656-metanephros development                                                                      | 5     | 0.0202532 |
| GO:0001709-cell fate determination                                                                      | 5     | 0.0074804 |
| GO:0030199-collagen fibril organization                                                                 | 5     | 0.004677  |
| GO:0001657-ureteric bud development                                                                     | 4     | 0.0499349 |
| GO:0070167-regulation of biomineral formation                                                           | 4     | 0.039845  |
| GO:0030500-regulation of bone mineralization                                                            | 4     | 0.0337599 |

**Table S4. GO analysis of KDM4B-dependent genes at basal level (Related to Figure 6)**

| GO Term                                                                             | Count | P Value  |
|-------------------------------------------------------------------------------------|-------|----------|
| GO:0045449-regulation of transcription                                              | 299   | 0.01623  |
| GO:0006350-transcription                                                            | 249   | 0.00816  |
| GO:0008104-protein localization                                                     | 122   | 5.00E-04 |
| GO:0006793-phosphorus metabolic process                                             | 120   | 0.02376  |
| GO:0006796-phosphate metabolic process                                              | 120   | 0.02376  |
| GO:0045184-establishment of protein localization                                    | 107   | 9.40E-04 |
| GO:0015031-protein transport                                                        | 105   | 0.00145  |
| GO:0010941-regulation of cell death                                                 | 103   | 0.01962  |
| GO:0043067-regulation of programmed cell death                                      | 102   | 0.02338  |
| GO:0042981-regulation of apoptosis                                                  | 101   | 0.02355  |
| GO:0016265-death                                                                    | 97    | 0.00515  |
| GO:0008219-cell death                                                               | 97    | 0.00424  |
| GO:0043933-macromolecular complex subunit organization                              | 91    | 0.02036  |
| GO:0006357-regulation of transcription from RNA polymerase II promoter              | 90    | 0.04473  |
| GO:0065003-macromolecular complex assembly                                          | 90    | 0.00526  |
| GO:0022610-biological adhesion                                                      | 87    | 0.04578  |
| GO:0006468-protein amino acid phosphorylation                                       | 85    | 0.02819  |
| GO:0012501-programmed cell death                                                    | 85    | 0.00331  |
| GO:0006915-apoptosis                                                                | 85    | 0.00219  |
| GO:0006461-protein complex assembly                                                 | 76    | 6.66E-04 |
| GO:0070271-protein complex biogenesis                                               | 76    | 6.66E-04 |
| GO:0006396-RNA processing                                                           | 71    | 0.03116  |
| GO:0007010-cytoskeleton organization                                                | 71    | 1.01E-04 |
| GO:0010942-positive regulation of cell death                                        | 61    | 0.0111   |
| GO:0043068-positive regulation of programmed cell death                             | 60    | 0.01478  |
| GO:0043065-positive regulation of apoptosis                                         | 60    | 0.01278  |
| GO:0070727-cellular macromolecule localization                                      | 58    | 0.01345  |
| GO:0034613-cellular protein localization                                            | 57    | 0.01722  |
| GO:0006886-intracellular protein transport                                          | 50    | 0.04484  |
| GO:0060548-negative regulation of cell death                                        | 50    | 0.02508  |
| GO:0043069-negative regulation of programmed cell death                             | 50    | 0.02386  |
| GO:0008285-negative regulation of cell proliferation                                | 49    | 0.03766  |
| GO:0043066-negative regulation of apoptosis                                         | 49    | 0.02702  |
| GO:0001501-skeletal system development                                              | 49    | 0.00449  |
| GO:0007167-enzyme linked receptor protein signaling pathway                         | 48    | 0.02374  |
| GO:0012502-induction of programmed cell death                                       | 47    | 0.0127   |
| GO:0006917-induction of apoptosis                                                   | 47    | 0.01199  |
| GO:0030029-actin filament-based process                                             | 42    | 8.48E-04 |
| GO:0030036-actin cytoskeleton organization                                          | 41    | 4.36E-04 |
| GO:0034660-ncRNA metabolic process                                                  | 37    | 0.00694  |
| GO:0043062-extracellular structure organization                                     | 37    | 7.20E-06 |
| GO:0001944-vasculature development                                                  | 36    | 0.03867  |
| GO:0007517-muscle organ development                                                 | 36    | 0.00302  |
| GO:0001568-blood vessel development                                                 | 35    | 0.04353  |
| GO:0030097-hemopoiesis                                                              | 34    | 0.04222  |
| GO:0048514-blood vessel morphogenesis                                               | 33    | 0.01621  |
| GO:0010608-posttranscriptional regulation of gene expression                        | 32    | 0.0266   |
| GO:0030198-extracellular matrix organization                                        | 32    | 2.81E-08 |
| GO:0008202-steroid metabolic process                                                | 30    | 0.04058  |
| GO:0022604-regulation of cell morphogenesis                                         | 29    | 1.32E-04 |
| GO:0043623-cellular protein complex assembly                                        | 27    | 0.01454  |
| GO:0016053-organic acid biosynthetic process                                        | 26    | 0.01541  |
| GO:0046394-carboxylic acid biosynthetic process                                     | 26    | 0.01541  |
| GO:0031589-cell-substrate adhesion                                                  | 26    | 1.34E-05 |
| GO:0051169-nuclear transport                                                        | 25    | 0.0333   |
| GO:0006913-nucleocytoplasmic transport                                              | 25    | 0.02914  |
| GO:0016311-dephosphorylation                                                        | 24    | 0.04323  |
| GO:0006399-tRNA metabolic process                                                   | 24    | 0.0019   |
| GO:0007160-cell-matrix adhesion                                                     | 24    | 2.34E-05 |
| GO:0030155-regulation of cell adhesion                                              | 23    | 0.02308  |
| GO:0051493-regulation of cytoskeleton organization                                  | 22    | 0.03801  |
| GO:0032446-protein modification by small protein conjugation                        | 22    | 0.02851  |
| GO:0016567-protein ubiquitination                                                   | 21    | 0.01872  |
| GO:0007018-microtubule-based movement                                               | 20    | 0.02145  |
| GO:0001503-ossification                                                             | 19    | 0.04634  |
| GO:0007178-transmembrane receptor protein serine/threonine kinase signaling pathway | 19    | 0.01719  |
| GO:0016125-sterol metabolic process                                                 | 19    | 0.01421  |
| GO:0034330-cell junction organization                                               | 18    | 3.74E-05 |
| GO:0051348-negative regulation of transferase activity                              | 17    | 0.03537  |
| GO:0008203-cholesterol metabolic process                                            | 17    | 0.02477  |
| GO:0033673-negative regulation of kinase activity                                   | 17    | 0.02047  |
| GO:0006469-negative regulation of protein kinase activity                           | 17    | 0.01511  |
| GO:0006352-transcription initiation                                                 | 16    | 0.02119  |
| GO:0008360-regulation of cell shape                                                 | 16    | 2.55E-04 |
| GO:0042063-gliogenesis                                                              | 15    | 0.0056   |
| GO:0007015-actin filament organization                                              | 14    | 0.03077  |
| GO:0008652-cellular amino acid biosynthetic process                                 | 14    | 0.00156  |
| GO:0034329-cell junction assembly                                                   | 14    | 1.53E-04 |
| GO:0051271-negative regulation of cell motion                                       | 13    | 0.02541  |
| GO:0045785-positive regulation of cell adhesion                                     | 13    | 0.01772  |
| GO:0043038-amino acid activation                                                    | 13    | 0.00188  |
| GO:0043039-tRNA aminoacylation                                                      | 13    | 0.00188  |
| GO:0040013-negative regulation of locomotion                                        | 12    | 0.04503  |
| GO:0051168-nuclear export                                                           | 12    | 0.04053  |
| GO:0030336-negative regulation of cell migration                                    | 12    | 0.02891  |
| GO:0045444-fat cell differentiation                                                 | 12    | 0.01741  |
| GO:0010001-glial cell differentiation                                               | 12    | 0.01741  |
| GO:0043244-regulation of protein complex disassembly                                | 12    | 0.01314  |
| GO:0051258-protein polymerization                                                   | 12    | 0.00972  |
| GO:0010810-regulation of cell-substrate adhesion                                    | 11    | 0.01672  |
| GO:0017015-regulation of transforming growth factor beta receptor signaling pathway | 11    | 0.00504  |
| GO:0016126-sterol biosynthetic process                                              | 11    | 0.00213  |
| GO:0043242-negative regulation of protein complex disassembly                       | 10    | 0.0213   |
| GO:0030199-collagen fibril organization                                             | 10    | 0.00187  |

**Table 5. GO analysis of KDM4B-dependent genes induced by BMP4/7 at 4hr (Related to Figure 6)**

| GO Term                                                                              | Count | P Value  |
|--------------------------------------------------------------------------------------|-------|----------|
| GO:0007242--intracellular signaling cascade                                          | 52    | 0.01391  |
| GO:0010604--positive regulation of macromolecule metabolic process                   | 39    | 0.00904  |
| GO:0042127--regulation of cell proliferation                                         | 35    | 0.01884  |
| GO:0010941--regulation of cell death                                                 | 34    | 0.04482  |
| GO:0043933--macromolecular complex subunit organization                              | 32    | 0.02138  |
| GO:0065003--macromolecular complex assembly                                          | 32    | 0.0091   |
| GO:0010605--negative regulation of macromolecule metabolic process                   | 31    | 0.04825  |
| GO:0006461--protein complex assembly                                                 | 27    | 0.00483  |
| GO:0070271--protein complex biogenesis                                               | 27    | 0.00483  |
| GO:0033554--cellular response to stress                                              | 26    | 0.0328   |
| GO:0001501--skeletal system development                                              | 25    | 3.10E-05 |
| GO:0007010--cytoskeleton organization                                                | 23    | 0.01134  |
| GO:0048598--embryonic morphogenesis                                                  | 19    | 0.00498  |
| GO:0060548--negative regulation of cell death                                        | 18    | 0.04231  |
| GO:0043069--negative regulation of programmed cell death                             | 18    | 0.04148  |
| GO:0043066--negative regulation of apoptosis                                         | 18    | 0.03676  |
| GO:0044271--nitrogen compound biosynthetic process                                   | 18    | 0.01795  |
| GO:0040008--regulation of growth                                                     | 17    | 0.04978  |
| GO:0051247--positive regulation of protein metabolic process                         | 15    | 0.01431  |
| GO:0032990--cell part morphogenesis                                                  | 14    | 0.04354  |
| GO:0030029--actin filament-based process                                             | 14    | 0.02885  |
| GO:0032270--positive regulation of cellular protein metabolic process                | 14    | 0.02266  |
| GO:0030036--actin cytoskeleton organization                                          | 14    | 0.01818  |
| GO:0045596--negative regulation of cell differentiation                              | 14    | 0.0129   |
| GO:0006366--transcription from RNA polymerase II promoter                            | 13    | 0.04738  |
| GO:0045597--positive regulation of cell differentiation                              | 13    | 0.04211  |
| GO:0007423--sensory organ development                                                | 13    | 0.04211  |
| GO:0031401--positive regulation of protein modification process                      | 13    | 0.01029  |
| GO:0006163--purine nucleotide metabolic process                                      | 13    | 0.00988  |
| GO:0060348--bone development                                                         | 13    | 3.03E-04 |
| GO:0001503--ossification                                                             | 13    | 1.61E-04 |
| GO:0048705--skeletal system morphogenesis                                            | 13    | 1.25E-04 |
| GO:0048667--cell morphogenesis involved in neuron differentiation                    | 12    | 0.04876  |
| GO:0007409--axonogenesis                                                             | 12    | 0.02991  |
| GO:0032269--negative regulation of cellular protein metabolic process                | 11    | 0.04323  |
| GO:0048729--tissue morphogenesis                                                     | 11    | 0.04323  |
| GO:0007178--transmembrane receptor protein serine/threonine kinase signaling pathway | 11    | 9.86E-04 |
| GO:0051216--cartilage development                                                    | 11    | 6.45E-05 |
| GO:0009259--ribonucleotide metabolic process                                         | 10    | 0.03184  |
| GO:0030198--extracellular matrix organization                                        | 10    | 0.00384  |
| GO:0009260--ribonucleotide biosynthetic process                                      | 9     | 0.03199  |
| GO:0048736--appendage development                                                    | 9     | 0.01175  |
| GO:0060173--limb development                                                         | 9     | 0.01175  |
| GO:0045937--positive regulation of phosphate metabolic process                       | 8     | 0.0297   |
| GO:0010562--positive regulation of phosphorus metabolic process                      | 8     | 0.0297   |
| GO:0035107--appendage morphogenesis                                                  | 8     | 0.02831  |
| GO:0035108--limb morphogenesis                                                       | 8     | 0.02831  |
| GO:0035113--embryonic appendage morphogenesis                                        | 8     | 0.01499  |
| GO:0030326--embryonic limb morphogenesis                                             | 8     | 0.01499  |
| GO:0001934--positive regulation of protein amino acid phosphorylation                | 7     | 0.04958  |
| GO:0009266--response to temperature stimulus                                         | 7     | 0.03725  |
| GO:0030278--regulation of ossification                                               | 7     | 0.02864  |
| GO:0030509--BMP signaling pathway                                                    | 7     | 0.00182  |
| GO:0009123--nucleoside monophosphate metabolic process                               | 6     | 0.04655  |
| GO:0009408--response to heat                                                         | 6     | 0.02523  |
| GO:0009612--response to mechanical stimulus                                          | 6     | 0.02523  |
| GO:0051291--protein heterooligomerization                                            | 6     | 0.01889  |
| GO:0045667--regulation of osteoblast differentiation                                 | 6     | 0.00869  |
| GO:0001649--osteoblast differentiation                                               | 6     | 0.00787  |
| GO:0030199--collagen fibril organization                                             | 6     | 0.00151  |
| GO:0060349--bone morphogenesis                                                       | 6     | 2.45E-04 |
| GO:0060350--endochondral bone morphogenesis                                          | 6     | 7.62E-05 |
| GO:0001958--endochondral ossification                                                | 6     | 1.52E-05 |
| GO:0017015--regulation of transforming growth factor beta receptor signaling pathway | 5     | 0.02808  |
| GO:0048332--mesoderm morphogenesis                                                   | 5     | 0.02579  |
| GO:0045669--positive regulation of osteoblast differentiation                        | 5     | 0.00598  |
| GO:0002062--chondrocyte differentiation                                              | 5     | 0.0017   |
| GO:0014013--regulation of gliogenesis                                                | 4     | 0.02343  |
| GO:0001502--cartilage condensation                                                   | 4     | 0.01784  |
| GO:0002063--chondrocyte development                                                  | 4     | 8.40E-04 |
| GO:0033158--regulation of protein import into nucleus, translocation                 | 3     | 0.02774  |
| GO:0033160--positive regulation of protein import into nucleus, translocation        | 3     | 0.01683  |
| GO:0060391--positive regulation of SMAD protein nuclear translocation                | 3     | 0.01226  |
| GO:0060390--regulation of SMAD protein nuclear translocation                         | 3     | 0.01226  |
| GO:0060395--SMAD protein signal transduction                                         | 3     | 0.01226  |



**Table S6. GO analysis of KDM4B-dependent genes induced by BMP4/7 at 24hr (Related to Figure 6)**

| GO Term                                                                             | Count | P Value    |
|-------------------------------------------------------------------------------------|-------|------------|
| GO:0006793-phosphorus metabolic process                                             | 34    | 0.0111238  |
| GO:0006796-phosphate metabolic process                                              | 34    | 0.0111238  |
| GO:0016310-phosphorylation                                                          | 30    | 0.00713318 |
| GO:0006468-protein amino acid phosphorylation                                       | 25    | 0.01488107 |
| GO:0043933-macromolecular complex subunit organization                              | 24    | 0.04783164 |
| GO:0065003-macromolecular complex assembly                                          | 23    | 0.04325222 |
| GO:0007167-enzyme linked receptor protein signaling pathway                         | 21    | 9.02E-05   |
| GO:0070271-protein complex biogenesis                                               | 20    | 0.01925059 |
| GO:0006461-protein complex assembly                                                 | 20    | 0.01925059 |
| GO:0019220-regulation of phosphate metabolic process                                | 18    | 0.04592089 |
| GO:0051174-regulation of phosphorus metabolic process                               | 18    | 0.04592089 |
| GO:0042325-regulation of phosphorylation                                            | 18    | 0.03349345 |
| GO:0001501-skeletal system development                                              | 18    | 8.58E-04   |
| GO:0040008-regulation of growth                                                     | 15    | 0.02172564 |
| GO:0048598-embryonic morphogenesis                                                  | 15    | 0.00945491 |
| GO:0009792-embryonic development ending in birth or egg hatching                    | 14    | 0.03813864 |
| GO:0043009-chordate embryonic development                                           | 14    | 0.03620641 |
| GO:0048729-tissue morphogenesis                                                     | 13    | 7.54E-04   |
| GO:0051347-positive regulation of transferase activity                              | 11    | 0.04427034 |
| GO:0033674-positive regulation of kinase activity                                   | 11    | 0.03577569 |
| GO:0007169-transmembrane receptor protein tyrosine kinase signaling pathway         | 11    | 0.0298722  |
| GO:0035295-tube development                                                         | 11    | 0.02686151 |
| GO:0010035-response to inorganic substance                                          | 10    | 0.04172587 |
| GO:0040007-growth                                                                   | 10    | 0.02234904 |
| GO:0048705-skeletal system morphogenesis                                            | 10    | 9.20E-04   |
| GO:0051259-protein oligomerization                                                  | 9     | 0.04224654 |
| GO:0043062-extracellular structure organization                                     | 9     | 0.03045153 |
| GO:0007178-transmembrane receptor protein serine/threonine kinase signaling pathway | 9     | 0.00217885 |
| GO:0051216-cartilage development                                                    | 9     | 2.41E-04   |
| GO:0048562-embryonic organ morphogenesis                                            | 8     | 0.03006825 |
| GO:0030198-extracellular matrix organization                                        | 8     | 0.00882001 |
| GO:0048706-embryonic skeletal system development                                    | 8     | 0.00166144 |
| GO:0060173-limb development                                                         | 7     | 0.02817143 |
| GO:0048736-appendage development                                                    | 7     | 0.02817143 |
| GO:0051260-protein homooligomerization                                              | 7     | 0.01981872 |
| GO:0048704-embryonic skeletal system morphogenesis                                  | 7     | 0.00167013 |
| GO:0030509-BMP signaling pathway                                                    | 7     | 4.14E-04   |
| GO:0045017-glycerolipid biosynthetic process                                        | 6     | 0.03357918 |
| GO:0016049-cell growth                                                              | 5     | 0.04759007 |
| GO:0010721-negative regulation of cell development                                  | 5     | 0.02217749 |
| GO:0050768-negative regulation of neurogenesis                                      | 5     | 0.01788517 |
| GO:0001656-metanephros development                                                  | 5     | 0.01657981 |
| GO:0030199-collagen fibril organization                                             | 5     | 0.00376701 |
| GO:0001657-ureteric bud development                                                 | 4     | 0.04297751 |
| GO:0001709-cell fate determination                                                  | 4     | 0.03700567 |

## Supplemental Materials and Methods

The primers for histone demethylase profiling are as follows:

| GENES     | FORWARD                      | REVERSE                   |
|-----------|------------------------------|---------------------------|
| KDM4A     | CCTCACTGCGCTGTCTGTAT         | CCAGTCGAAGTGAAGCACAT      |
| KDM4B     | CGGGTTCTATCTTTGTTTCTCTCACCCG | AAGGAAGCCTCTGGAACACCTG    |
| KDM4C     | GGCATAGGTGACAGGGTGTGTC       | CGGGGACCAAACCTCTGGAAACCCG |
| KDM4D     | CGGGATCTGCACAGATTATCCACCCG   | AGTTTCTGAGGAGGGGCGACCA    |
| KDM5A     | GTTTCTTAAGGTGGCAAGTC         | TCTTTTGTACTGTTCCCTAC      |
| KDM5B     | AGCTTTCTCAGAATGTTGGC         | GCAGAGTCTGGGAATTCACA      |
| KDM5C     | GGGTTTCTAAAGTGTAGATCT        | CCACACATCTGAGCTTTAGT      |
| KDM5D     | ATCTCCTCACCTCTCCAAAG         | TTGTCTCTAGGCGTGGCCGT      |
| KDM3A     | ACCTGCAGTTATTCTTCAGC         | TAATGCCAGTCCATATGCCAT     |
| KDM3B     | TGTTCCCTGGGGACTCCTCT         | GGGCACTACAGTACAGCTGG      |
| JMJD1C    | TTTGTTGAAGCTATTGACTG         | CACTTTAACAAAAGCAAGCC      |
| KDM2B     | GTTAGTGGTAGTGGTGTTTTGG       | AGCAGATGTGGTGTGTGGTC      |
| KDM2A     | CGGATAGTTGAGAAAGCCAAGATCCG   | CTCTTTGGTGGGCCTCTGTAGC    |
| KDM6A     | CGTCCGAGTGTCAACCAACTGGACG    | TGAGAGTCTGGAGTAGGAGCAG    |
| KDM6B     | CTCAACTTGGGCCTCTTCTC         | GCCTGTCAGATCCCAGTTCT      |
| UTY       | ATTCTGAAGCAATATCAGAC         | TACAGTAATGAGCTGGTTCA      |
| PHF2      | TCGGCACTTCTCTGTTCTCCC        | AAATCCAGCCCCTCCGTGTC      |
| PTH8      | CTTTCTCTACCTTGGGGACC         | TAGGGACTCACGTGCTAGGG      |
| KIAA1718  | ATCTGTGAACTTTGGAGAGG         | TAGGGACTCACGTGCTAGGG      |
| LOC339123 | AGCAAGCGACACACACTCAC         | GCACTCAACTCTTCACAGGA      |
| JMJD4     | GGCCCTTCCAGAAATAAAGACC       | CAGGCAGTGGCCATGAACAG      |
| JMJD5     | GTGGGGAGAGCCCAGAAGGACATT     | GACCCACCCGTTTCCCAAAA      |
| HAIRLESS  | AGACCTCTGCCCTCTCTGCT         | GCTTGGAACACAGCCCAGTC      |
| FIH1      | TACTTAACCTCTCTGAGCC          | CCAACAACCCTGAGGTAGAT      |
| HSPBAP1   | ACGTAGAAGCTACACTCGAAG        | TAAGCCCAGAACTTGGAATG      |
| JARID2    | AAGTGCTGCTTACATCACTG         | AGTGGATCATAGGACGTTCC      |
| PTDSR     | AGGTGGATCACTTGAGGTCA         | CACCACACCTGGCTAATTTT      |
| PLA2G4B   | GCCCAGGCCACACATAATTT         | AGTGGTAGCTTTCCATGTGG      |
